# Algorithmic methods to infer the evolutionary trajectories in cancer progression

Giulio Caravagna<sup>1,2,\*</sup> Alex Graudenzi<sup>1,3</sup> Daniele Ramazzotti<sup>1</sup>  
Rebeca Sanz-Pamplona<sup>4</sup> Luca De Sano<sup>1</sup> Giancarlo Mauri<sup>1,5</sup>  
Victor Moreno<sup>4,6</sup> Marco Antoniotti<sup>1,7</sup> Bud Mishra<sup>8</sup>

May 17, 2016

<sup>1</sup> Department of Informatics, Systems and Communication, University of Milan-Bicocca, Milan, Italy.

<sup>2</sup> School of Informatics, University of Edinburgh, Edinburgh, UK.

<sup>3</sup> Institute of Molecular Bioimaging and Physiology of the Italian National Research Council (IBFM-CNR), Milan, Italy.

<sup>4</sup> Unit of Biomarkers and Susceptibility, Cancer Prevention and Control Program, Catalan Institute of Oncology (ICO), IDIBELL & CIBERESP. Hospitalet de Llobregat, Barcelona, Spain.

<sup>5</sup> SYSBIO Centre of Systems Biology, Milano, Italy.

<sup>6</sup> Department of Clinical Sciences, Faculty of Medicine, University of Barcelona, Barcelona, Spain.

<sup>7</sup> Milan Center for Neuroscience, University of Milan-Bicocca, Milan, Italy.

<sup>8</sup> Courant Institute of Mathematical Sciences, New York University, New York, USA.

\* Corresponding author, [giulio.caravagna@ed.ac.uk](mailto:giulio.caravagna@ed.ac.uk).

## Contents

|          |                                                                  |           |
|----------|------------------------------------------------------------------|-----------|
| <b>1</b> | <b>Introduction</b>                                              | <b>2</b>  |
| <b>2</b> | <b>The PicNic pipeline</b>                                       | <b>5</b>  |
| 2.1      | Reducing inter-tumor heterogeneity by cohort subtyping . . . . . | 5         |
| 2.2      | Selection of driver events . . . . .                             | 6         |
| 2.3      | Fitness equivalence of exclusive alterations . . . . .           | 6         |
| 2.4      | Progression inference and confidence estimation . . . . .        | 8         |
| <b>3</b> | <b>Results</b>                                                   | <b>9</b>  |
| 3.1      | Evolution in a population of MSI/MSS colorectal tumors. . . . .  | 9         |
| <b>4</b> | <b>Discussion</b>                                                | <b>11</b> |
| <b>5</b> | <b>Materials and methods</b>                                     | <b>13</b> |

## List of Figures

|   |                                                                 |    |
|---|-----------------------------------------------------------------|----|
| 1 | Problem statement and overview of the PicNic pipeline . . . . . | 21 |
| 2 | The PicNic pipeline . . . . .                                   | 22 |
| 3 | Data processed for MSI-HIGH tumors . . . . .                    | 23 |
| 4 | Progression of MSS tumors . . . . .                             | 24 |
| 5 | Progression of MSI-HIGH tumors . . . . .                        | 25 |

37

## Abstract

38

39

40

41

42

43

44

45

46

47

48

49

50

51

52

The genomic evolution inherent to cancer relates directly to a renewed focus on the voluminous next generation sequencing (NGS) data, and machine learning for the inference of explanatory models of how the (epi)genomic events are choreographed in cancer initiation and development. However, despite the increasing availability of multiple additional -omics data, this quest has been frustrated by various theoretical and technical hurdles, mostly stemming from the dramatic heterogeneity of the disease. In this paper, we build on our recent works on “selective advantage” relation among driver mutations in cancer progression and investigate its applicability to the modeling problem at the population level. Here, we introduce PiCnIc (Pipeline for Cancer Inference), a versatile, modular and customizable pipeline to extract ensemble-level progression models from cross-sectional sequenced cancer genomes. The pipeline has many translational implications as it combines state-of-the-art techniques for sample stratification, driver selection, identification of fitness-equivalent exclusive alterations and progression model inference. We demonstrate PiCnIc’s ability to reproduce much of the current knowledge on colorectal cancer progression, as well as to suggest novel experimentally verifiable hypotheses.

53

KEYWORDS: Cancer evolution; Selective advantage; Bayesian Structural Inference

54

55

56

57

58

59

60

61

STATEMENT OF SIGNIFICANCE: *A causality based new machine learning Pipeline for Cancer Inference (PicNic) is introduced to infer the underlying somatic evolution of ensembles of tumors from next generation sequencing data. PicNic combines techniques for sample stratification, driver selection and identification of fitness-equivalent exclusive alterations to exploit a novel algorithm based on Suppes’ probabilistic causation. The accuracy and translational significance of the results are studied in details, with an application to colorectal cancer. PicNic pipeline has been made publicly accessible for reproducibility, interoperability and for future enhancements.*

62

## 1 Introduction

63

64

65

66

67

68

69

70

71

72

73

74

75

76

77

78

Since the late seventies evolutionary dynamics, with its interplay between variation and selection, has progressively provided the widely-accepted paradigm for the interpretation of cancer emergence and development [1–3]. Random alterations of an organism’s (epi)genome can sometimes confer a functional *selective advantage*<sup>1</sup> to certain cells, in terms of adaptability and ability to survive and proliferate. Since the consequent *clonal expansions* are naturally constrained by the availability of resources (metabolites, oxygen, etc.), further mutations in the emerging heterogeneous tumor populations are necessary to provide additional *fitness* of different kinds that allow survival and proliferation in the unstable micro environment. Such further advantageous mutations will eventually allow some of their sub-clones to outgrow the competing cells, thus enhancing tumor’s heterogeneity as well as its ability to overcome future limitations imposed by the rapidly exhausting resources. Competition, predation, parasitism and cooperation have been in fact theorized as co-present among cancer clones [4].

In the well-known vision of Hanahan and Weinberg [5, 6], the phenotypic stages that characterize this multistep evolutionary process are called *hallmarks*. These can be acquired by cancer cells in many possible alternative ways, as a result of a complex biological interplay at several spatio-temporal scales that is still only partially deciphered [7]. In this framework, we distinguish

---

<sup>1</sup>For this and other technical terms commonly used in the statistics and cancer biology communities we provide a Glossary in the Supplementary Material.

79 “alterations” driving the hallmark acquisition process (i.e., *drivers*) by activating *oncogenes* or in-  
80 activating *tumor suppressor genes*, from those that are transferred to sub-clones without increasing  
81 their fitness (i.e., *passengers*) [8]. Driver identification is a modern challenge of cancer biology, as  
82 distinct cancer types exhibit very different combinations of drivers, some cancers display mutations  
83 in hundreds of genes [9], and the majority of drivers is mutated at low frequencies (“long tail”  
84 distribution), hindering their detection only from the statistics of the recurrence at the population-  
85 level [10].

86 Cancer clones harbour distinct types of alterations. The *somatic* (or *genetic*) ones involve  
87 either few nucleotides or larger chromosomal regions. They are usually catalogued as *mutations*  
88 - i.e., single nucleotide or structural variants at multiple scales (insertions, deletions, inversions,  
89 translocations) – of which only some are detectable as *Copy Number Alterations* (CNAs), most  
90 prevalent in many tumor types [11]. Also *epigenetic* alterations, such as *DNA methylation* and  
91 *chromatin reorganization*, play a key role in the process [12]. The overall picture is confounded  
92 by factors such as *genetic instability* [13], *tumor-microenvironment* interplay [14,15], and by the  
93 influence of *spatial organization* and *tissue specificity* on tumor development [16]<sup>2</sup>.

94 Significantly, in many cases, distinct driver alterations can damage in a similar way the same  
95 *functional pathway*, leading to the acquisition of new hallmarks [17–21]. Such alterations individu-  
96 ally provide an equivalent *fitness gain* to cancer cells, as any additional alteration hitting the same  
97 pathway would provide no further selective advantage. This dynamic results in groups of driver  
98 alterations that form *mutually exclusive* patterns across tumor samples from different patients (i.e.,  
99 the sets of alterations that are involved in the same pathways tend not to occur mutated together).  
100 This phenomenon has significant translational consequences.

101 An immediate challenge posed by this state of affairs is the dramatic *heterogeneity* of cancer, both  
102 at the *inter-tumor* and at the *intra-tumor* levels [22]. The former manifests as different patients with  
103 the same cancer type can display few common alterations. This observation led to the development  
104 of techniques to stratify tumors into *subtypes* with different genomic signatures, prognoses and  
105 response to therapy [23]. The latter form of heterogeneity refers to the observed genotypic and  
106 phenotypic variability among the cancer cells within a single neoplastic lesion, characterized by the  
107 coexistence of more than one cancer clones with distinct evolutionary histories [24].

108 Cancer heterogeneity poses a serious problem from the diagnostic and therapeutic perspective  
109 as, for instance, it is now acknowledged that a single biopsy might not be representative of other  
110 parts of the tumor, hindering the problem of devising effective treatment strategies [4]. Therefore,  
111 presently the quest for an extensive etiology of cancer heterogeneity and for the identification of  
112 cancer evolutionary trajectories is central to cancer research, which attempts to exploit the massive  
113 amount of sequencing data available through public projects such as The Cancer Genome Atlas  
114 (TCGA) [25].

115 Such projects involve an increasing number of *cross-sectional* (epi)genomic profiles collected via  
116 single biopsies of patients with various cancer types, which might be used to extract trends of cancer  
117 evolution across a population of samples<sup>3</sup>. Higher resolution data such as *multiple samples* collected  
118 from the same tumor [24], as well as *single-cell* sequencing data [26], might be complementarily  
119 used to face the same problem within a specific patient. However, the lack of public data coupled

<sup>2</sup>We mention that much attention has been recently casted on newly discovered cancer genes affecting global processes that are apparently not directly related to cancer development, such as cell signaling, chromatin and epigenomic regulation, RNA splicing, protein homeostasis, metabolism and lineage maturation [10].

<sup>3</sup>At the time of this writing, in TCGA, sample sizes per cancer type are in the order of a few hundreds. Such numbers are expected to increase in the near future, with a clear benefit for all the statistical approaches to analyze cancer data which currently lack a proper background of data.

120 to the problems of accuracy and reliability, currently prevents a straightforward application [27].

121 These different perspectives lead to the different mathematical formulations of the problem of  
122 *inferring a cancer progression model* from genomic data, and a need for versatile computational tools  
123 to analyze data reproducibly – two intertwined issues examined at length in this paper [28]. Indeed,  
124 such models and tools can be focused either on characteristics of a population, i.e. *ensemble-level*,  
125 or on multiple clonality in a *single-patient*. In general, both problems deal with understanding the  
126 *temporal ordering of somatic alterations* accumulating during cancer evolution, but use orthogonal  
127 perspectives and different input data – see Figure 1 for a comparison. This paper proposes a  
128 new computational approach to efficiently deal with various aspects of the problem at a patient  
129 population level, relegating the other aspects to future publications.

130 **Ensemble-level cancer evolution.** It is thus desirable to extract a *probabilistic graphical model*  
131 explaining the statistical trend of accumulation of somatic alterations in a population of  $n$  cross-  
132 sectional samples collected from patients diagnosed with a specific cancer. To normalize against  
133 the experimental conditions in which tumors are sampled, we only consider the *list of alterations*  
134 *detected per sample* – thus, as 0/1 Bernoulli random variables.

135 Much of the difficulty lies in estimating the true and unknown trends of *selective advantage*  
136 among genomic alterations in the data, from such observations. This hurdle is not unsurmountable,  
137 if we constrain the scope to only those alterations that are *persistent across tumor evolution in all*  
138 *sub-clonal populations*, since it yields a consistent model of a temporal ordering of mutations.  
139 Therefore, epigenetic and transcriptomic states, such as hyper and hypo-methylations or over and  
140 under expression, could only be used, provided that they are persistent through tumor development  
141 [29].

142 Historically, the linear model of colorectal tumor progression by Vogelstein is an instance of  
143 an early solution to the cancer progression problem [30]. That approach was later generalized to  
144 accommodate *tree-models of branched evolution* [31–34] and later, further generalized to the infer-  
145 ence of *directed acyclic graph* models, with several distinct strategies [35–38]. We contributed to  
146 this research program with the Cancer Progression Extraction with Single Edges (CAPRESE) and the  
147 Cancer Progression Inference (CAPRI) algorithms, which are currently implemented in TRONCO, an  
148 open source R package for Translational Oncology available in standard repositories [39–41]. Both  
149 techniques rely on Suppes’ theory of probabilistic causation to define estimators of selective advan-  
150 tage [42], are robust to the presence of noise in the data and perform well even with limited sample  
151 sizes. The former algorithm exploits shrinkage-like statistics to extract a tree model of progression,  
152 the latter combines bootstrap and maximum likelihood estimation with regularization to extract  
153 general directed acyclic graphs that capture branched, independent and confluent evolution. Both  
154 algorithms represent the current state-of-the-art approach to this problem, as they outperform  
155 others in speed, scale and predictive accuracy.

156 **Clonal architecture in individual patients.** A closely related problem addresses the detection  
157 of clonal signatures and their prevalence in individual tumors, a problem complicated by *intra-tumor*  
158 heterogeneity.

159 Even though this phylogenetic version of the progression inference problem naturally relies on  
160 data produced from *single-cell sequencing* assays [43, 44], the majority of approaches still make use  
161 of *bulk sequencing* data, usually from multiple biopsies of the same tumors [24, 45]. Indeed, several  
162 approaches try to extract the clonal signature of single tumors from *allelic imbalance proportions*,



163 a problem made difficult as sequenced samples usually contain a large number of cells belonging to  
164 a collection of sub-clones resulting from the complex evolutionary history of the tumor [46–55].

165 We keep the current work focused on the inference of progression models at the ensemble level,  
166 and plan to return to this variant to the problem in another publication.

## 167 2 The PicNic pipeline

168 We report on the design, development and evaluation of the Pipeline for Cancer Inference (PicNic)  
169 to extract ensemble-level cancer progression models from cross-sectional data (Figure 1). PicNic  
170 is versatile, modular and customizable; it exploits state-of-the-art data processing and machine  
171 learning tools to:

- 172 1. identify *tumor subtypes* and then in each subtype;
- 173 2. select (epi)genomic events *relevant* to the progression;
- 174 3. identify groups of events that are likely to be observed as *mutually exclusive*;
- 175 4. infer *progression models* from groups and related data, and annotate them with associated  
176 statistical confidence.

177 All these steps are necessary to minimize the confounding effects of inter-tumor heterogeneity, which  
178 are likely to lead to wrong results when data is not appropriately pre-processed<sup>4</sup>.

179 In each stage of PicNic different techniques can be employed, alternatively or jointly, according  
180 to specific research goals, input data, and cancer type. Prior knowledge can be easily accommo-  
181 dated into our pipeline, as well as the computational tools discussed in the next subsections and  
182 summarized in Figure 2. The rationale is similar in spirit to workflows implemented by consortia  
183 such as TCGA to analyze huge populations of cancer samples [56, 57]. One of the main novelties  
184 of our approach, is the exploitation of groups of exclusive alterations as a proxy to detect fitness-  
185 equivalent trajectories of cancer progression. This strategy is only feasible by the hypothesis-testing  
186 features of the recently developed CAPRI algorithm, an algorithm uniquely addressing this crucial  
187 aspect of the ensemble-level progression inference problem [40].

188 In the Results section, we study in details a specific use-case for the pipeline, processing colorectal  
189 cancer data from TCGA, where it is able to re-discover much of the existing body of knowledge  
190 about colorectal cancer progression. Based on the output of this pipeline, we also propose novel  
191 experimentally-verifiable hypotheses.

### 192 2.1 Reducing inter-tumor heterogeneity by cohort subtyping

193 In general, for each of  $n$  tumors (patients) we assume relevant (epi)genetic data to be available. We  
194 do not put constraints on data gathering and selection, leaving the user to decide the appropriate  
195 “resolution” of the input data. For instance, one might decide whether somatic mutations should  
196 be classified by type or by location, or aggregated. Or, one might decide to lift focal CNAs to

---

<sup>4</sup>The genuine selectivity relationship sought to be inferred are subject to the vagaries of Simpson’s paradox; it can change, or worst reverse, when we try to infer them from data not suitably pre-processed. This effect (due to such paradox) manifests as data are sampled from a highly heterogenous mixture of populations of cells [40]. PicNic uses various mechanisms to avoid these pitfalls. In this context, it should be pointed out that input bulk sequencing data suffers also from intra-tumor heterogeneity issues, which are unfortunately intrinsic to the technology.

197 the lower resolution of cytobands or full arms (e.g., in a kidney cancer cohort where very long  
198 CNAs are more common than focal events [58]). These choices depend on data and on the overall  
199 understanding of such alterations and their functional effects for the cancer under study, and no  
200 single all-encompassing rationale may be provided.

201 With these data at hand, we might wish to identify cancer subtypes in the *heterogeneous mixture*  
202 of input samples. In some cases the classification can benefit from clinical biomarkers, such as  
203 evidences of certain cell types [59], but in most cases we will have to rely on multiple *clustering*  
204 techniques at once, see, e.g., [56,57]. Many common approaches cluster expression profiles [60], often  
205 relying on non-negative matrix factorization techniques [61] or earlier approaches such as *k*-means,  
206 Gaussians mixtures or hierarchical/spectral clustering - see the review in [62]. For glioblastoma  
207 and breast cancer, for instance, mRNA expression subtypes provides good correlation with clinical  
208 phenotypes [63–65]. However, this is not always the case as, e.g., in colorectal cancer such clusters  
209 mismatch with survival and chemotherapy response [63]. Clustering of *full exome* mutation profiles  
210 or smaller panels of genes might be an alternative as it was shown for ovarian, uterine and lung  
211 cancers [66,67].

212 Using pipelines such as PicNic, we expect that the resulting subtypes will be routinely in-  
213 vestigated, eventually leading to distinct progression models, which shall be characteristic of the  
214 population-level trends of cancer initiation and progression.

## 215 2.2 Selection of driver events

216 In subtypes detection, it becomes easier to find similarities across input samples when more al-  
217 terations are available, as features selection gains precision. In progression inference, instead, one  
218 wishes to focus on  $m \ll n$  *driver* alterations, which ensure also an appropriate statistical ratio  
219 between sample size ( $n$ , here the subtype size) and problem dimension ( $m$ ).

220 Multiple tools filter out driver from passenger mutations. MutSigCV identifies drivers mutated  
221 more frequently than background mutation rate [68]. OncodriveFM avoids such estimation but  
222 looks for functional mutations [69]. OncodriveCLUST scans mutations clustering in small regions  
223 of the protein sequence [70]. MuSiC uses multiple types of clinical data to establish correlations  
224 among mutation sites, genes and pathways [71]. Some other tools search for driver CNAs that affect  
225 protein expression [72]. All these approaches use different statistical measures to estimate signs of  
226 positive selection, and we suggest using them in an orchestrated way, as done by platforms such as  
227 Intogen [73].

228 We anticipate that such tools will run independently on each subtype, as driver genes will likely  
229 differ across them, mimicking the different molecular properties of each group of samples; also, lists  
230 of genes produced by these tools might be augmented with prior knowledge about tumor suppressors  
231 or oncogenes.

## 232 2.3 Fitness equivalence of exclusive alterations

233 When working at the ensemble-level, identification of “groups of mutually exclusive” alterations is  
234 crucial to derive a correct inference. This step of PicNic is another attempt to resolve part of the  
235 inter-tumor heterogeneity, as such alterations *could* lead to the same phenotype (i.e., hence resulting  
236 “equivalent” in terms of progression), despite being genotypically “alternative”, i.e., exclusive, across  
237 the input cohort. This information shall be used to detect alternative routes to cancer progression  
238 which capture the specificities of individual patients.

239 A plethora of recent tools can be used to detect groups of fitness equivalent alterations, according  
240 to the data available for each subtype; greedy approaches [74, 75] or their optimizations, such as  
241 MEMO, which constrain search-space with network priors [76]. This strategy is further improved  
242 in MUTEX, which scans mutations and focal CNAs for genes with a common downstream effect  
243 in a curated signalling network, and selects only those genes that significantly contributes to the  
244 exclusivity pattern [77]. Other tools such as Dendrix, MDPFinder, Multi-Dendrix, CoMEt, MEGSA  
245 or ME, employ advanced statistics or generative approaches without priors [78–83].

246 In such groups, we distinguish between *hard* and *soft* forms of exclusivity, the former assuming  
247 strict exclusivity among alterations, with random errors accounting for possible overlaps (i.e., the  
248 majority of samples do not share alterations from such groups), the latter admitting co-occurrences  
249 (i.e., some samples might have common alterations, within a group) [77].

250 CAPRI is currently the only algorithm which incorporates this type of information, in inferring  
251 a model. Each of these groups are in fact associated with a “testable hypothesis” written in the well-  
252 known language of *propositional Boolean formulas*<sup>5</sup>. Consider the following example: we might be  
253 informed that APC and CTNNB1 *mutations* show a trend of soft-exclusivity in our cohort – i.e., some  
254 samples harbor both mutations, but the majority just one of the two mutated genes. Since such  
255 mutations lead to  $\beta$ -catenin deregulation (the phenotype), we might wonder whether such state of  
256 affairs could be responsible for progression initiation in the tumors under study. An affirmative  
257 response would equate, in terms of progression, the two mutations. To *test this hypothesis*, one may  
258 spell out formula  $APC \vee CTNNB1$  to CAPRI, which means that we are suggesting to the inference  
259 engine that, besides the possible evolutionary trajectories that might be inferred by looking at the  
260 two mutations as *independent*, trajectories involving such a “composite” event, shall be considered  
261 as well. It is then up to CAPRI to decide which, of all such trajectories, is significant, in a *statistical*  
262 *sense*.

263 In general, formulas allow users to test general hypotheses about complex model structures  
264 involving multiple genes and alterations. These are useful in many cases: for instance, where  
265 we are processing samples which harbour homozygous losses or inactivating mutations in certain  
266 genes (i.e., equally disruptive genomic events), or when we know in advance that certain genes are  
267 controlling the same pathway, and we might speculate that a single hit in one of those decreases the  
268 selection pressure on the others. We note that, with no hypothesis, a model with such alternative  
269 trajectories *cannot be analyzed, due to various computational* limitations inherent to the inferential  
270 algorithms (see [40]).

271 From a practical point of view, CAPRI’s formulas/hypotheses-testing features “help” the inference  
272 process, but do not “force” it to select a specific model, i.e., the *inference is not biased*. In this  
273 sense, the trajectories inferred by examining these composite model structures (i.e., the formulas)  
274 *are not given any statistical advantage* for inclusion in the final model. However, in spite of a natural  
275 temptation to generate as many hypotheses as possible, it is prudent to always limit the number  
276 of hypotheses according to the number of samples and alterations. Note that this approach can  
277 also be extended to accommodate, for instance, co-occurrent alterations in significantly mutated  
278 subnetworks [84, 85].

---

<sup>5</sup>There, logical connectives such as  $\oplus$  (the logical “xor”) act as a proxy for hard-exclusivity, and  $\vee$  (the logical “disjunction”) for soft one. Besides from exclusivity groups, other connectives such as logical conjunction can be used.

## 279 2.4 Progression inference and confidence estimation

280 We use CAPRI to reconstruct cancer progression models of each identified molecular subtype, pro-  
281 vided that there exist a reasonable list of driver events and the groups of fitness-equivalent exclusive  
282 alterations. Since currently CAPRI represents the state of the art, and supports complex formulas  
283 for groups of alterations detected in the earlier PicNic step, it was well-suited for the task.

284 CAPRI's input is a binary  $n \times (m + k)$  matrix  $\mathbf{M}$  with  $n$  samples (a subtype size),  $m$  driver  
285 alteration events (0/1 Bernoulli random variables) and  $k$  testable formulas. Each sample in  $\mathbf{M}$  is  
286 described by a binary sequence: the 1's denote the presence of alterations. CAPRI first performs a  
287 computationally fast *scan* of  $\mathbf{M}$  to identify a set  $\mathcal{S}$  of plausible selective advantage relations among  
288 the driver alterations and the formulas; then, it reduces  $\mathcal{S}$  to the most relevant ones,  $\hat{\mathcal{S}} \subset \mathcal{S}$ . Each  
289 relation is represented as an edge connecting drivers/formulas in a Graphical Model – which shall be  
290 termed Suppes-Bayes Causal Network. This network represents the *joint probability distribution*<sup>6</sup> of  
291 observing a set of driver alterations in a cancer genome, subject to constraints imposed by Suppes'  
292 *probabilistic causation* formalism [42].

293 Set  $\mathcal{S}$  is built by a statistical procedure. Among any pair of input drivers/formulas  $x$  and  $y$ ,  
294 CAPRI postulates that  $x \rightarrow y \in \mathcal{S}$  could be a selective advantage relation with “ $x$  selecting for  $y$ ” if  
295 it estimates that two conditions hold

- 296 1. “ $x$  is earlier than  $y$ ”;
- 297 2. “ $x$ 's presence increases the probability of observing  $y$ ”.

298 Such claims, grounded in Suppes' theory of probabilistic causation, are expressed as inequalities  
299 over *marginal* and *conditional* distributions of  $x$  and  $y$ . These are assessed via a standard Mann-  
300 Whitney U test after the distributions are estimated from a reasonable number (e.g., 100) of *non-*  
301 *parametric bootstrap resamples* of  $\mathbf{M}$  (see Supplementary Material). CAPRI's increased performance  
302 over existing methods can be motivated by the reduction of the state space within which models  
303 are searched, via  $\mathcal{S}$ .

304 Optimization of  $\mathcal{S}$  is central to our tolerance to *false positives* and *negatives* in  $\hat{\mathcal{S}}$ . We would like  
305 to select only the minimum number of relations which are true and statistically supported, and build  
306 our model from those. CAPRI's implementation in TRONCO [41] selects a subset by optimizing a  
307 *score function* which assigns to a model a real number equal to its *log-likelihood* (probability of  
308 generating data for the model) minus a *penalty term* for model complexity – a regularization term  
309 increasing with  $\hat{\mathcal{S}}$ 's size, and hence penalizing overly complex models. It is a standard approach to  
310 avoid overfitting, and usually relies on the Akaike or the Bayesian Information Criterion (AIC or BIC)  
311 as regularizers. Both scores are approximately correct; AIC is more prone to overfitting but likely  
312 to provide also good predictions from data and is better when false negatives are more misleading  
313 than positive ones. BIC is more prone to underfitting errors, thus more parsimonious and better

<sup>6</sup>Technically, for a set of  $m$  alterations modeled by variables  $\mathbf{x}_1, \dots, \mathbf{x}_m$ , such a network is a Graphical Model representing the factorization of the joint distribution –  $\mathcal{P}(\mathbf{x}_1, \dots, \mathbf{x}_m)$  – of observing any of the alterations in a genome (i.e.,  $\mathbf{x}_i = 1$ ). This factorization is made compact as the model encodes the statistical dependencies in its structure via

$$\mathcal{P}(\mathbf{x}_1, \dots, \mathbf{x}_m) = \prod_{i=1}^m \mathcal{P}(\mathbf{x}_i \mid \pi_i)$$

where  $\pi_i = \{\mathbf{x}_j \mid \mathbf{x}_j \rightarrow \mathbf{x}_i \in \hat{\mathcal{S}}\}$  are the “parents” of the  $i$ -th node. These are those from which the presence of the  $i$ -th alteration is predicted. In our approach these edges are the pictorial representation of the selective advantage relations where the alterations in  $\pi_i$  select for  $\mathbf{x}_i$ .

314 in opposite direction. As often done, we suggest approaches that to combine but distinguish which  
315 relations are selected by BIC versus AIC. Details on the algorithm are provided as see Supplementary  
316 Material.

317 **Statistical confidence of a model.** In-vitro and in-vivo experiments provide the most convinc-  
318 ing validation for the newly suggested selective advantage relations and hypotheses, yet this is out  
319 of reach in some cases.

320 Nonetheless, statistical validation approaches can be used almost universally to assess the confi-  
321 dence of edges, parent sets and whole models, either via *hypothesis-testing* or *bootstrap* and *cross-*  
322 *validation* scores for Graphical Models. We briefly discuss approaches that are implemented in  
323 TRONCO, and refer to the Supplementary Materials for additional details.

324 First, CAPRI builds  $\mathcal{S}$  by computing two p-values per edge, for the confidence in condition (1)  
325 and (2). In addition, for each edge  $x \rightarrow y$ , it computes a third p-value via hypergeometric testing  
326 against the hypothesis that the co-occurrence of  $x$  and  $y$  is due to chance. These p-values measure  
327 confidence in the direction of each edge and the amount of statistical dependence among  $x$  and  $y$ .

328 Second, for each model inferred with CAPRI we can estimate (*a posteriori*) how frequently our  
329 edges would be retrieved if we resample from our data (*non-parametric* bootstrap), or from the  
330 model itself, assuming its correctness (*parametric* bootstrap) [86]. Also, we can measure the bias  
331 in CAPRI's construction of  $\mathcal{S}$  due to the random procedure which estimates the distributions in  
332 condition (1) and (2) (*statistical* bootstrap).

333 Third, scores can be computed to quantify the consistency for the model against bias in the  
334 data and models. For instance, *non-exhaustive k-fold* cross-validation can be used to compute the  
335 *entropy loss* for the whole model, and the *prediction* and *posterior classification errors* for each edge  
336 or parent set [87].

## 337 3 Results

### 338 3.1 Evolution in a population of MSI/MSS colorectal tumors.

339 It is common knowledge that *colorectal cancer* (CRC) is a heterogeneous disease comprising different  
340 molecular entities. Indeed, it is currently accepted that colon tumors can be classified according  
341 to their global genomic status into two main types: *microsatellite unstable tumors* (MSI), fur-  
342 ther classified as high or low, and *microsatellite stable* (MSS) tumors (also known as tumors with  
343 *chromosomal instability*). This taxonomy plays a significant role in determining pathologic, clinical  
344 and biological characteristics of CRC tumors [88]. Regarding molecular progression, it is also well  
345 established that each subtype arises from a distinctive molecular mechanism. While MSS tumors  
346 generally follow the classical adenoma-to-carcinoma progression described in the seminal work by  
347 Vogelstein and Fearon [89], MSI tumors result from the inactivation of DNA mismatch repair genes  
348 like MLH-1 [90].

349 With the aid of the TRONCO package, we instantiated PicNic to process colorectal tumors  
350 freely available through TCGA project COADREAD [56] (see Supplementary Figure S1), and in-  
351 ferred models for the MSS and MSI-HIGH tumor subtypes (shortly denoted MSI) annotated by the  
352 consortium. In doing so, we used a combination of background knowledge produced by TCGA and  
353 new computational predictions; to a different degree, some knowledge comes from manual curation  
354 of data and other from tools mentioned in PicNic's description (see Figure 2). Data and exclusiv-

355 ity groups for MSI tumors are shown in Figure 3, the analogous for MSS tumors is provided as  
356 Supplementary Material.

357 For the models inferred, which are shown in Figures 4 and 5, we evaluated various forms of  
358 statistical confidence measured as p-values, bootstrap scores (in what follows, **npb** denotes non-  
359 parametric bootstrap and the closer to 100 the better), and cross-validation statistics reported  
360 in the Supplementary Material. Many of the postulated selective advantage relations (i.e., model  
361 edges) have very strong statistical support for COADREAD samples, although events with similar  
362 marginal frequency may lead to ambiguous imputed temporal ordering (i.e., the edge direction). In  
363 general, we observed that overall the estimates are slightly better in the MSS cohort (entropy loss  
364 < 1% versus 3.8%), which is expected given the difference in sample size of the two datasets (152  
365 versus 27 samples), see Material and Methods for details.

366 **Interpretation of the models.** Our models capture the well-known features distinguishing MSS  
367 and MSI tumors: for the former APC, KRAS and TP53 mutations as primary events together with  
368 chromosomal aberrations, for the latter BRAF mutations and lack of chromosomal alterations. Of all  
369 33 driver genes, 15 are common to both models - e.g., APC, BRAF, KRAS, NRAS, TP53 and FAM123B  
370 among others (mapped to pathways like WNT, MAPK, apoptosis or activation of T-cell lymphocytes),  
371 although in different relationships (position in the model), whereas new (previously un-implicated)  
372 genes stood out from our analysis and deserve further research.

373 *MSS (Microsatellite Stable).* In agreement with the known literature, in addition to KRAS, TP53  
374 and APC as primary events, we identify PTEN as a late event in the carcinogenesis, as well as  
375 NRAS and KRAS converging in IGF2 amplification, the former being “selected by” TP53 muta-  
376 tions (**npb** 49%), the latter “selecting for” PIK3CA mutations (**npb** 81%). The leftmost portion  
377 of the model links many WNT genes, in agreement with the observation that multiple con-  
378 current lesions affecting such pathway confer selective advantage. In this respect, our model  
379 predicts multiple routes for the selection of alterations in SOX9 gene, a transcription factor  
380 known to be active in colon mucosa [91]. Its mutations are directly selected by APC/CTNNB1  
381 alterations (though with low **npb** score), by ARID1A (**npb** 34%) or by FBXW7 mutations (**npb**  
382 49%), an early mutated gene that both directly, and in a redundant way via CTNNB1, relates  
383 to SOX9. The SOX family of transcription factors have emerged as modulators of canonical  
384 WNT/ $\beta$ -catenin signaling in many disease contexts [92]. Also interestingly, FBXW7 has  
385 been previously reported to be involved in the malignant transformation from adenoma to  
386 carcinoma [93]. The rightmost part of the model involves genes from various pathways, and  
387 outlines the relation between KRAS and the PI3K pathway. We indeed find selection of PIK3CA  
388 mutations by KRAS ones, as well as selection of the whole MEMO module (**npb** 64%), which is  
389 responsible for the activation of the PI3K pathway [56]. SMAD4 proteins relate either to KRAS  
390 (**npb** 34%), and FAM123B (through ATM) and TCF7L2 converge in DKK2 or DKK4 (**npb** 81, 17  
391 and 34%).

392 *MSI-HIGH (Microsatellite Unstable).* In agreement with the current literature, BRAF is the most  
393 commonly mutated gene in MSI tumors [94]. CAPRI predicted convergent evolution of tu-  
394 mors harbouring FBXW7 or APC mutations towards deletions/mutations of NRAS gene (**npb**  
395 21, 28 and 54%), as well as selection of SMAD2 or SMAD4 mutations by FAM123B mutations  
396 (**npb** 23 and 46%), for these tumors. Relevant to all MSI tumors seems again the role of  
397 the PI3K pathway. Indeed, a relation among APC and PIK3CA mutations was inferred (**npb**  
398 66%), consistent with recent experimental evidences pointing at a synergistic role of these



399 mutations, which co-occur in the majority of human colorectal cancers [95]. Similarly, we  
400 find consistently a selection trend among APC and the whole MEMO module (npb 48%). In-  
401 terestingly, both mutations in APC and ERBB3 select for KRAS mutations (npb 51 and 27%),  
402 which might point to interesting therapeutic implications. In contrast, mutations in BRAF  
403 mostly select for mutations in ACVR1B (npb 36%), a receptor that once activated phospho-  
404 rylates SMAD proteins. It forms receptor complex with ACVR2A, a gene mutated in these  
405 tumors that selects for TCF7L2 mutations (npb 34%). Tumors harbouring TP53 mutations  
406 are those selected by mutations in AXIN2 (npb 32%), a gene implicated in WNT signalling  
407 pathway, and related to unstable gastric cancer development [96]. Inactivating mutations in  
408 this gene are important, as it provides serrated adenomas with a mutator phenotype in the  
409 MSI tumorigenic pathway [97]. Thus, our results reinforce its putative role as driver gene in  
410 these tumors.

411 By comparing these models we can find similarity in the prediction of a potential new early event  
412 for CRC formation, FBXW7, as other authors have recently described [93]. This tumor suppressor  
413 is frequently inactivated in human cancers, yet the molecular mechanism by which it exerts its  
414 anti-tumor activity remains unexplained [98], and our models provide a new hypothesis in this  
415 respect.

## 416 4 Discussion

417 This paper represents our continued exploration of the nature of somatic evolution in cancer, and  
418 its translational exploitation through models of cancer progression, models of drug resistance (and  
419 efficacy), left- and right-censoring, sample stratification, and therapy design. Thus this paper em-  
420 phasizes the engineering and dissemination of production-quality computational tools as well as  
421 validation of its applicability via use-cases carried out in collaboration with translational collabo-  
422 rators: e.g., colorectal cancer, analyzed jointly with epidemiologists currently studying the disease  
423 actively. As anticipated, we reasserted that the proposed model of somatic evolution in cancer not  
424 only supports the heterogeneity seen in tumor population, but also suggests a selectivity/causality  
425 relation that can be used in analyzing (epi)genomic data and exploited in therapy design – which we  
426 introduced in our earlier works [39, 40]. In this paper, we have introduced an open-source pipeline,  
427 PicNic, which minimizes the confounding effects arising from inter-tumor heterogeneity, and we have  
428 shown that PicNic can be effective in extracting ensemble-level evolutionary trajectories of cancer  
429 progression.

430 When applied to a highly-heterogeneous cancer such as colorectal, PicNic was able to infer  
431 the role of many known events in colorectal cancer progression (e.g., APC, KRAS or TP53 in MSS  
432 tumors, and BRAF in MSI ones), confirming the validity of our approach<sup>7</sup>. Interestingly, new players  
433 in CRC progression stand out from this analysis such as FBXW7 or AXIN2, which deserve further  
434 investigation. In colon carcinogenesis, although each model identifies characteristic early mutations  
435 suggesting different initiation events, both models appear to converge in common pathways and  
436 functions such as WNT or MAPK.

---

<sup>7</sup>As a further investigation for CRC, we leave as future work to check whether the inferred progression are also representative of other subtyping strategies for colorectal cancer, with particular reference to recent works which show marked interconnectivity between different independent classification systems coalescing into four consensus molecular subtypes [99].



437 However, both models have some clear distinctive features. Specific events in MSS include  
438 mutations in intracellular genes like CTNNB1 or in PTEN, a well-known tumor suppressor gene. On  
439 the contrary, specific mutations in MSI tumors appear in membrane receptors such as ACVR1B,  
440 ACVR2A, ERBB3, LRP5, TGFBR1 and TGFBR2, as well as in secreted proteins like IGF2, possibly  
441 suggesting that such tumors need to disturb cell-cell and/or cell-microenvironment communication  
442 to grow. At the pathway level, genes exclusively appearing in the MSI progression model accumulate  
443 in specific pathways such as cytokine-cytokine receptor, endocytosis and TGF- $\beta$  signaling pathway.  
444 On the other hand, genes in MSS progression model are implicated in P53, mTOR, sodium transport  
445 or inositol phosphate metabolism.

446 Our study also highlighted the translational relevance of the models that we can produce with  
447 PicNic (see Supplementary Figure S12). The evolutionary trajectories depicted by our models can,  
448 for instance, suggest previously-uncharacterized phenotypes, help in finding biomarker molecules  
449 predicting cancer progression and therapy response, explain drug resistant phenotypes and predict  
450 metastatic outcomes. The logical structure of the formulas describing alterations with equivalent  
451 fitness (i.e., the exclusivity group) can also point to novel targets of therapeutic interventions.  
452 In fact, exclusivity groups that are found to have a role in the progression can be screened for  
453 *synthetic lethality* among such genes – thus explaining why we do not observe phenotypes where  
454 such alterations co-occur. In this sense, our models describe also such clonal signatures which,  
455 though theoretically possible, are not selected. We call such conspicuously absent phenotypes *anti-*  
456 *hallmarks* [100].

457 Our models have other applications to both computational and cancer research. Our models,  
458 as encoded by Suppes-Bayes Causal Networks could be used as informative *generative models* for  
459 the genomic profiles for the cancer patients. In fact, as known in machine learning, such generative  
460 models are extremely useful in creating better representation of data in terms of, e.g., discriminative  
461 kernels, such as Fisher [101]. In practice, this change of representations would allow framing common  
462 classification problems in the domain of our generative structures, i.e., the models, rather than the  
463 data. As a consequence, it is possible to create a new class of more robust classification and  
464 prediction systems.

465 One may think of these representations as those bringing us closer to phenotypic (and causal)  
466 representation of the patient's tumor, replacing its genotypic (and mutational) representation. We  
467 suspect that such representations will improve the accuracy of measurement of the biological clocks,  
468 dysregulated in cancer and critically needed to be measured in order to predict survival time, time  
469 to metastasis, time to evolution of drug resistance, etc. We believe that these “phenotypic clocks”  
470 can be used immediately to direct the therapeutic intervention.

471 Clearly, applicability and reliability of techniques such as PicNic is very much dependent on  
472 the background of data available. At the time of this writing, the quality, quantity and reliability  
473 of (epi)genomic data available, e.g., in public databases, is related to the ever increasing com-  
474 putational and technological improvements characterizing the wide area of cancer genomics. Of  
475 similar importance is the availability of wet-lab technologies for models validation. Our recent work  
476 on SubOptical Mapping technology, for instance, points to the ability to cheaply and accurately  
477 characterize translocation, indels and epigenomic modifications at the single molecule and single  
478 cell level [102, 103]. This technology also provides the ability to directly validate (or refute) the  
479 hypotheses generated by PicNic via gene-correction and single cell perturbation approaches.

480 To conclude, the precision of any statistical inference technique, including PicNic, is influenced  
481 by the quality, availability and idiosyncrasies of the input data – the goodness of the outcomes  
482 improving along with the expected advancement in the field. Nevertheless, the strength of the

483 proposed approach lies in the efficacy in managing possibly noisy/ biased or insufficient data, and  
484 in proposing refutable hypotheses for experimental validation.

## 485 5 Materials and methods

486 **Processing COADREAD samples with PiCnIc.** We instantiated PicNic to process clinically  
487 annotated high MSI-HIGH and MSS colorectal tumors collected from The Cancer Genome Atlas  
488 project “Human Colon and Rectal Cancer” (COADREAD) [56] – see Supplementary Figure S1.  
489 Details on the implementation and the source code to replicate this study are available as Supple-  
490 mentary Material. COADREAD has enough samples, especially for MSS tumors, to implement a  
491 consistent and significant statistical validation of our findings – see Supplementary Table S1.

492 In brief, we split subtypes by the microsatellite status of each tumor as annotated by the con-  
493 sortium (so, step I of PicNic is done by exploiting background knowledge rather than computational  
494 predictors). It should be expected that if this step is skipped or this classification is incorrect, the  
495 resulting models would noticeably differ. Once split into groups, the input COADREAD data is  
496 processed to maintain only samples for which both high-quality curated mutation and CNA data  
497 are available; for CNAs we use focal high-level amplifications and homozygous deletions.

498 Then, for each sample we select only alterations (mutations/CNAs) from a list of 33 driver genes  
499 manually annotated to 5 pathways in [56] - WNT, RAF, TGF- $\beta$ , PI3K and P53 (Supplementary Figures  
500 S2 and S3). This list of drivers, step II of PicNic, is produced by TCGA, as a result of manual  
501 curation and running MutSigCV.

502 In the next module of the pipeline, we fetch groups of exclusive alterations. We scanned these  
503 groups by using the MUTEX tool (Supplementary Table S2), and merged its results with the  
504 group that TCGA detected by using the MEMO tool, which involves mainly genes from the PI3K  
505 pathway. Knowledge on the potential exclusivity among genes in the WNT (APC,CTNNB1) and RAF  
506 (KRAS,NRAS,BRAF) pathways was exploited as well. Groups were then used to create CAPRI’s  
507 formulas; we also included hypotheses for genes which harbour mutations and homozygous deletions  
508 across different samples, see Supplementary Table S3. Data and exclusivity groups for MSS tumors  
509 are shown in Supplementary Figure S4 and S5.

510 CAPRI was run, as the last step of PicNic, on each subtype, by selecting recurrent alterations  
511 from the pool of 33 pathway genes and using both AIC/BIC regularizer. Timings to run the relevant  
512 steps of the pipeline are reported in the Supplementary Material. In the models of Figures 4 and  
513 Figure 5 each edge mirrors selective advantage among the upstream and downstream nodes, as  
514 estimated by CAPRI; Mann-Withney U test is carried out with statistical significance 0.05, after  
515 100 non-parametric bootstrap iterations.

516 The significance of the reconstructed models and the input data is assessed by computing all the  
517 statistics/tests discussed in the Main text (temporal priority, probability raising and hypergeometric  
518 testing p-values, bootstrap and cross-validation scores). Motivation and background on each of  
519 these measures is available in the Supplementary Materials. A table with their values for edges  
520 with highest non-parametric bootstrap scores is in Supplementary Figure S8.

521 For the MSS cohort all the p-values are strongly significant ( $p \ll 0.01$ ) except for the temporal  
522 priority of the edges connecting mutations in FAM123B and ATM, and ERBB2 alterations (mutations  
523 and amplifications), which leads us to conclude that, even if these pairs of genes seem to undergo  
524 selective advantage, the temporal ordering of their occurrence is ambiguous and failed to be imputed  
525 correctly from the datasets, analyzed here. The same situation occurs in MSI-HIGH tumors, for the  
526 relation between KRAS and ERBB3. Non-parametric and statistical bootstrap estimations are used

527 to assess the strength of all the findings (Supplementary Figures S6 and S7). Moreover, any bias  
528 in the data is finally evaluated by cross-validation (Supplementary Figures S8-S11) and common  
529 statistics such as entropy loss, posterior classification and prediction errors. In general, most of the  
530 selective advantage relations depicted by the inferred models present a strong statistical support,  
531 with the MSS cohort presenting the most reliable results.

532 Summary implementation for COADREAD (PicNic steps, Figure 2): (1) TCGA clinical classi-  
533 fication, (2) MutSigCV and TCGA manual curation, (3) MEMO, MUTEX and knowledge of `wnt`  
534 and `raf` pathways and (4) CAPRI.

535 **Implement your own case study with PiCnIc/TRONCO.** TRONCO started as a project  
536 before PicNic, and is our effort at collecting, in a free R package, algorithms to infer progression  
537 models from genomic data. In its current version it offers the implementation of the CAPRI  
538 and CAPRESE algorithms, as well as a set of routines to pre-process genomic data. With the  
539 invention of PicNic, it started accommodating software routines to easily interface CAPRI and  
540 CAPRESE to some of the tools that we mention in Figure 2. In particular, in its current 2.0  
541 version it supports input/output for the Matlab Network Based Stratification tool (NBS) and  
542 the Java MUTEX tool, as well as the possibility to fetch data available from the cBioPortal for  
543 Cancer Genomics (<http://cbioportal.org>), which provides a Web resource  
544 for exploring, visualizing, and analyzing multidimensional cancer genomics data.

545 We plan to extend TRONCO in the future to support other similar tools and become an integral  
546 part of daily laboratory routines, thus facilitating application of PiCnIc to additional use cases.

547 **Authors contributions** This work follows up on our earlier project initiated by BM and carried  
548 out by Milan-Bicocca and the Catalan Institute of Oncology, based on a framework discussed at  
549 the 2014 School on Cancer, Systems and Complexity (CSAC). PicNic was designed and constructed  
550 by MA's Bioinformatics lab at University of Milan-Bicocca, within a project led and supervised by  
551 GC. GC, AG and DR designed the pipeline, and GC, DR and LDS coded and executed it. Data  
552 gathering and model interpretation was done by GC, LDS, DR, AG together with BM, VM and  
553 RSP. GM, MA, VM and BM provided overall organizational guidance and discussion. GC, AG,  
554 RSP and BM wrote the original draft of the paper, which all authors reviewed and revised in the  
555 final form. BM and MA are co-senior authors.

556 **Acknowledgments** MA, GM, GC, AG, DR acknowledge the SysBioNet project, a MIUR initia-  
557 tive for the Italian Roadmap of European Strategy Forum on Research Infrastructures (ESFRI) and  
558 Regione Lombardia (Italy) for the research projects RetroNet through the ASTIL Program [12-4-  
559 5148000-40]; U.A 053 and Network Enabled Drug Design project [ID14546A Rif SAL-7], Fondo Ac-  
560 cordi Istituzionali 2009. BM acknowledges founding by the NSF grants CCF-0836649, CCF-0926166  
561 and a NCI-PSOC grant. VM and RSP acknowledge the Instituto de Salud Carlos III supported by  
562 The European Regional Development Fund (ERDF) grants PI11-01439, PIE13/00022, the Spanish  
563 Association Against Cancer (AECC) Scientific Foundation, and the Catalan Government DURSI,  
564 grant 2014SGR647.

565 We wish to thank the anonymous reviewers for their help in improving the quality and rigor of  
566 the presentation.

## 567 References

- 568 [1] Nowell PC (1976) The clonal evolution of tumor cell populations. *Science* 194:23–28.
- 569 [2] Fidler IJ (1978) Tumor heterogeneity and the biology of cancer invasion and metastasis.  
570 *Cancer Research* 38:2651–2660.
- 571 [3] Dexter DL, et al. (1978) Heterogeneity of tumor cells from a single mouse mammary tumor.  
572 *Cancer Research* 38:3174–3181.
- 573 [4] Merlo LM, Pepper JW, Reid BJ, Maley CC (2006) Cancer as an evolutionary and ecological  
574 process. *Nature Reviews Cancer* 6:924–935.
- 575 [5] Hanahan D, Weinberg RA (2000) The hallmarks of cancer. *Cell* 100:57–70.
- 576 [6] Hanahan D, Weinberg RA (2011) Hallmarks of cancer: the next generation. *Cell* 144:646–674.
- 577 [7] Huang S, Ernberg I, Kauffman S (2009) *Cancer attractors: a systems view of tumors from a*  
578 *gene network dynamics and developmental perspective* (Elsevier), No. 7, pp 869–876.
- 579 [8] Futreal PA, et al. (2004) A census of human cancer genes. *Nature Reviews Cancer* 4:177–183.
- 580 [9] Vogelstein B, et al. (2013) Cancer genome landscapes. *Science* 339:1546–1558.
- 581 [10] Garraway LA, Lander ES (2013) Lessons from the cancer genome. *Cell* 153:17–37.
- 582 [11] Zack TI, et al. (2013) Pan-cancer patterns of somatic copy number alteration. *Nature Genetics*  
583 45:1134–1140.
- 584 [12] Baylin SB, Jones PA (2011) A decade of exploring the cancer epigenome - biological and  
585 translational implications. *Nature Reviews Cancer* 11:726–734.
- 586 [13] Weinberg R (2013) *The Biology of Cancer* (Garland Science).
- 587 [14] Albini A, Sporn MB (2007) The tumour microenvironment as a target for chemoprevention.  
588 *Nature Reviews Cancer* 7:139–147.
- 589 [15] Greaves M, Maley CC (2012) Clonal evolution in cancer. *Nature* 481:306–313.
- 590 [16] Nowak MA, Michor F, Iwasa Y (2003) The linear process of somatic evolution. *Proceedings*  
591 *of the National Academy of Sciences* 100:14966–14969.
- 592 [17] Vogelstein B, Kinzler KW (2004) Cancer genes and the pathways they control. *Nature*  
593 *Medicine* 10:789–799.
- 594 [18] Nowak MA (2006) *Evolutionary Dynamics* (Harvard University Press).
- 595 [19] Wood LD, et al. (2007) The genomic landscapes of human breast and colorectal cancers.  
596 *Science* 318:1108–1113.

- 597 [20] Jones S, et al. (2008) Core signaling pathways in human pancreatic cancers revealed by global  
598 genomic analyses. *Science* 321:1801–1806.
- 599 [21] Parsons DW, et al. (2008) An integrated genomic analysis of human glioblastoma multiforme.  
600 *Science* 321:1807–1812.
- 601 [22] Fisher R, Puzstai L, Swanton C (2013) Cancer heterogeneity: implications for targeted  
602 therapeutics. *British Journal of Cancer* 108:479–485.
- 603 [23] Curtis C, et al. (2012) The genomic and transcriptomic architecture of 2,000 breast tumours  
604 reveals novel subgroups. *Nature* 486:346–352.
- 605 [24] Gerlinger M, et al. (2012) Intratumor heterogeneity and branched evolution revealed by  
606 multiregion sequencing. *The New England Journal of Medicine* 366:883–892.
- 607 [25] (2015) The Cancer Genome Atlas (TCGA) <https://tcga-data.nci.nih.gov>  
608 <https://tcga-data.nci.nih.gov>.
- 609 [26] Navin N, et al. (2011) Tumour evolution inferred by single-cell sequencing. *Nature* 472:90–94.
- 610 [27] Eberwine J, Sul JY, Bartfai T, Kim J (2014) The promise of single-cell sequencing. *Nature*  
611 *Methods* 11:25–27.
- 612 [28] Beerenwinkel N, Schwarz RF, Gerstung M, Markowitz F (2015) Cancer evolution: mathe-  
613 matical models and computational inference. *Systematic biology* 64:e1–e25.
- 614 [29] Ramchandani S, Bhattacharya SK, Cervoni N, Szyf M (1999) DNA methylation is a reversible  
615 biological signal. *Proceedings of the National Academy of Sciences* 96:6107–6112.
- 616 [30] Vogelstein B, et al. (1988) Genetic alterations during colorectal-tumor development. *The*  
617 *New England Journal of Medicine* 319:525–532.
- 618 [31] Desper R, et al. (1999) Inferring tree models for oncogenesis from comparative genome  
619 hybridization data. *Journal of Computational Biology* 6:37–51.
- 620 [32] Desper R, et al. (2000) Distance-based reconstruction of tree models for oncogenesis. *Journal*  
621 *of Computational Biology* 7:789–803.
- 622 [33] Szabo A, Boucher K (2002) Estimating an oncogenetic tree when false negatives and positives  
623 are present. *Mathematical Biosciences* 176:219–236.
- 624 [34] Beerenwinkel N, et al. (2005) Learning multiple evolutionary pathways from cross-sectional  
625 data. *Journal of Computational Biology* 12:584–598.
- 626 [35] Beerenwinkel N, Eriksson N, Sturmfels B (2007) Conjunctive Bayesian networks. *Bernoulli*  
627 pp 893–909.
- 628 [36] Gerstung M, Baudis M, Moch H, Beerenwinkel N (2009) Quantifying cancer progression with  
629 conjunctive Bayesian networks. *Bioinformatics* 25:2809–2815.
- 630 [37] Attolini CSO, et al. (2010) A mathematical framework to determine the temporal sequence of  
631 somatic genetic events in cancer. *Proceedings of the National Academy of Sciences* 107:17604–  
632 17609.

- 633 [38] Misra N, Szczurek E, Vingron M (2014) Inferring the paths of somatic evolution in cancer.  
634 *Bioinformatics* 17:2456-763.
- 635 [39] Olde Loohuis L, et al. (2014) Inferring tree causal models of cancer progression with proba-  
636 bility raising. *PLOS ONE* 9:e115570.
- 637 [40] Ramazzotti D, et al. (2015) CAPRI: efficient inference of cancer progression models from  
638 cross-sectional data. *Bioinformatics* 31:3016-3026.
- 639 [41] De Sano L, et al. (2016) TRONCO: an R package for the inference of cancer progres-  
640 sion models from heterogeneous genomic data. *Bioinformatics*, 10.1093/bioinformatics/  
641 btw03510.1093/bioinformatics/btw035.
- 642 [42] Suppes P (1970) *A Probabilistic Theory of Causality* (North-Holland Publishing Company  
643 Amsterdam).
- 644 [43] Navin NE (2014) Cancer genomics: one cell at a time. *Genome Biology* 15:452.
- 645 [44] Wang Y, et al. (2014) Clonal evolution in breast cancer revealed by single nucleus genome  
646 sequencing. *Nature* 512:155-160.
- 647 [45] Gerlinger M, et al. (2014) Genomic architecture and evolution of clear cell renal cell carcino-  
648 mas defined by multiregion sequencing. *Nature Genetics* 46:225-233.
- 649 [46] Oesper L, Mahmoody A, Raphael BJ (2013) THetA: inferring intra-tumor heterogeneity from  
650 high-throughput dna sequencing data. *Genome Biol* 14:R80.
- 651 [47] Oesper L, Satas G, Raphael BJ (2014) Quantifying tumor heterogeneity in whole-genome  
652 and whole-exome sequencing data. *Bioinformatics* 30:3532-3540.
- 653 [48] Miller CA, et al. (2014) SciClone: inferring clonal architecture and tracking the spatial and  
654 temporal patterns of tumor evolution. *PLOS Computational Biology* 8:e1003665.
- 655 [49] Roth A, et al. (2014) PyClone: statistical inference of clonal population structure in cancer.  
656 *Nature Methods* 11:396-398.
- 657 [50] Jiao W, Vembu S, Deshwar AG, Stein L, Morris Q (2014) Inferring clonal evolution of tumors  
658 from single nucleotide somatic mutations. *BMC Bioinformatics* 15:35.
- 659 [51] Fischer A, Vázquez-García I, Illingworth CJ, Mustonen V (2014) High-definition reconstruc-  
660 tion of clonal composition in cancer. *Cell Reports* 7:1740-1752.
- 661 [52] Zare H, et al. (2014) Inferring clonal composition from multiple sections of a breast cancer.  
662 *PLOS Computatioanl Biology* 7:e1003703.
- 663 [53] Garvin T, et al. (2015) Interactive analysis and assessment of single-cell copy-number varia-  
664 tions. *Nature methods* 12:1058-1060.
- 665 [54] Malikic S, McPherson AW, Donmez N, Sahinalp CS (2015) Clonality inference in multiple  
666 tumor samples using phylogeny. *Bioinformatics* 31:1349-1356.
- 667 [55] El-Kebir M, Oesper L, Acheson-Field H, Raphael BJ (2015) Reconstruction of clonal trees  
668 and tumor composition from multi-sample sequencing data. *Bioinformatics* 31:i62-i70.



- 669 [56] The Cancer Genome Atlas Network, et al. (2012) Comprehensive molecular characterization  
670 of human colon and rectal cancer. *Nature* 487:330–337.
- 671 [57] Network CGAR, et al. (2013) Genomic and epigenomic landscapes of adult de novo acute  
672 myeloid leukemia. *The New England Journal of Medicine* 368:2059.
- 673 [58] Network CGAR, et al. (2013) Comprehensive molecular characterization of clear cell renal  
674 cell carcinoma. *Nature* 499:43–49.
- 675 [59] Bennett JM, et al. (1976) Proposals for the classification of the acute leukaemias french-  
676 american-british (FAB) co-operative group. *British Journal of Haematology* 33:451–458.
- 677 [60] Lu J, et al. (2005) MicroRNA expression profiles classify human cancers. *Nature* 435:834–838.
- 678 [61] Gao Y, Church G (2005) Improving molecular cancer class discovery through sparse non-  
679 negative matrix factorization. *Bioinformatics* 21:3970–3975.
- 680 [62] de Souto MC, Costa IG, de Araujo DS, Ludermit TB, Schliep A (2008) Clustering cancer  
681 gene expression data: a comparative study. *BMC Bioinformatics* 9:497.
- 682 [63] Network CGAR, et al. (2011) Integrated genomic analyses of ovarian carcinoma. *Nature*  
683 474:609–615.
- 684 [64] Konstantinopoulos PA, et al. (2010) Gene expression profile of BRCAness that correlates  
685 with responsiveness to chemotherapy and with outcome in patients with epithelial ovarian  
686 cancer. *Journal of Clinical Oncology* 28:3555–3561.
- 687 [65] Reis-Filho JS, Pusztai L (2011) Gene expression profiling in breast cancer: classification,  
688 prognostication, and prediction. *The Lancet* 378:1812–1823.
- 689 [66] Hofree M, Shen JP, Carter H, Gross A, Ideker T (2013) Network-based stratification of tumor  
690 mutations. *Nature Methods* 10:1108–1115.
- 691 [67] Zhong X, Yang H, Zhao S, Shyr Y, Li B (2015) Network-based stratification analysis of 13  
692 major cancer types using mutations in panels of cancer genes. *BMC Genomics* 16:S7.
- 693 [68] Lawrence MS, et al. (2013) Mutational heterogeneity in cancer and the search for new cancer-  
694 associated genes. *Nature* 499:214–218.
- 695 [69] Gonzalez-Perez A, Lopez-Bigas N (2012) Functional impact bias reveals cancer drivers. *Nu-  
696 cleic Acids Research* 21:e169.
- 697 [70] Tamborero D, Gonzalez-Perez A, Lopez-Bigas N (2013) OncodriveCLUST: exploiting the  
698 positional clustering of somatic mutations to identify cancer genes. *Bioinformatics* 29:2238–  
699 2244.
- 700 [71] Dees ND, et al. (2012) MuSiC: identifying mutational significance in cancer genomes. *Genome  
701 Research* 22:1589–1598.
- 702 [72] Tamborero D, Lopez-Bigas N, Gonzalez-Perez A (2013) Oncodrive-CIS: a method to reveal  
703 likely driver genes based on the impact of their copy number changes on expression. *PLOS  
704 ONE* 8:e55489.



- 705 [73] Gundem G, et al. (2010) IntOGen: integration and data mining of multidimensional oncoge-  
706 nomic data. *Nature Methods* 7:92–93.
- 707 [74] Yeang CH, McCormick F, Levine A (2008) Combinatorial patterns of somatic gene mutations  
708 in cancer. *The FASEB Journal* 22:2605–2622.
- 709 [75] Miller CA, Settle SH, Sulman EP, Aldape KD, Milosavljevic A (2011) Discovering functional  
710 modules by identifying recurrent and mutually exclusive mutational patterns in tumors. *BMC*  
711 *Medical Genomics* 4:34.
- 712 [76] Ciriello G, Cerami E, Sander C, Schultz N (2012) Mutual exclusivity analysis identifies  
713 oncogenic network modules. *Genome Research* 22:398–406.
- 714 [77] Babur Ö, et al. (2015) Systematic identification of cancer driving signaling pathways based  
715 on mutual exclusivity of genomic alterations. *Genome Biology* 16.
- 716 [78] Vandin F, Upfal E, Raphael BJ (2012) De novo discovery of mutated driver pathways in  
717 cancer. *Genome Research* 22:375–385.
- 718 [79] Zhao J, Zhang S, Wu LY, Zhang XS (2012) Efficient methods for identifying mutated driver  
719 pathways in cancer. *Bioinformatics* 28:2940–2947.
- 720 [80] Leiserson MD, Blokh D, Sharan R, Raphael BJ (2013) Simultaneous identification of multiple  
721 driver pathways in cancer. *PLOS Computational Biology* 5:e1003054.
- 722 [81] Leiserson MDM, Wu HT, Vandin F, Raphael BJ (2015) CoMET: a statistical approach to  
723 identify combinations of mutually exclusive alterations in cancer. *Genome Biology* 16:160.
- 724 [82] Hua X, et al. (2015) MEGSA: A powerful and flexible framework for analyzing  
725 mutual exclusivity of tumor mutations. *bioRxiv* [http://dx.doi.org/10.1101/](http://dx.doi.org/10.1101/027474)  
726 [027474](http://dx.doi.org/10.1101/027474)<http://dx.doi.org/10.1101/027474>.
- 727 [83] Szczurek E, Beerenwinkel N (2014) Modeling mutual exclusivity of cancer mutations. *PLoS*  
728 *Computational Biology* 10.
- 729 [84] Leiserson MD, et al. (2015) Pan-cancer network analysis identifies combinations of rare  
730 somatic mutations across pathways and protein complexes. *Nature Genetics* 47:106–114.
- 731 [85] Vandin F, Upfal E, Raphael BJ (2011) Algorithms for detecting significantly mutated path-  
732 ways in cancer. *Journal of Computational Biology* 18:507–522.
- 733 [86] Efron B, Tibshirani RJ (1994) *An Introduction to the Bootstrap* (CRC press).
- 734 [87] Koller D, Friedman N (2009) *Probabilistic Graphical Models: Principles and Techniques -*  
735 *Adaptive Computation and Machine Learning* (The MIT Press).
- 736 [88] Ogino S, Goel A (2008) Molecular classification and correlates in colorectal cancer. *The*  
737 *Journal of Molecular Diagnostics* 10:13–27.
- 738 [89] Fearon ER, Vogelstein B (1990) A genetic model for colorectal tumorigenesis. *Cell* 61:759–767.
- 739 [90] Vilar E, Gruber SB (2010) Microsatellite instability in colorectal cancer - the stable evidence.  
740 *Nature reviews Clinical oncology* 7:153–162.

- 741 [91] Abdel-Samad R, et al. (2011) MiniSOX9, a dominant-negative variant in colon cancer cells.  
742 *Oncogene* 30:2493–2503.
- 743 [92] Kormish JD, Sinner D, Zorn AM (2010) Interactions between sox factors and wnt/ $\beta$ -catenin  
744 signaling in development and disease. *Developmental Dynamics* 239:56–68.
- 745 [93] Li L, et al. (2014) Sequential expression of miR-182 and miR-503 cooperatively targets  
746 FBXW7, contributing to the malignant transformation of colon adenoma to adenocarcinoma.  
747 *The Journal of Pathology* 234:488–501.
- 748 [94] Kim JH, Kang GH (2014) Molecular and prognostic heterogeneity of microsatellite-unstable  
749 colorectal cancer. *World Journal of Gastroenterology* 20:4230.
- 750 [95] Deming DA, et al. (2014) PIK3CA and APC mutations are synergistic in the development  
751 of intestinal cancers. *Oncogene* 33:2245–2254.
- 752 [96] Kim MS, Kim SS, Ahn CH, Yoo NJ, Lee SH (2009) Frameshift mutations of Wnt pathway  
753 genes AXIN2 and TCF7L2 in gastric carcinomas with high microsatellite instability. *Human*  
754 *Pathology* 40:58–64.
- 755 [97] Muto Y, et al. (2014) DNA methylation alterations of AXIN2 in serrated adenomas and colon  
756 carcinomas with microsatellite instability. *BMC Cancer* 14:466.
- 757 [98] Zhan P, et al. (2015) FBXW7 negatively regulates ENO1 expression and function in colorectal  
758 cancer. *Laboratory Investigation* 9:995?1004.
- 759 [99] Guinney J, et al. (2015) The consensus molecular subtypes of colorectal cancer. *Nature*  
760 *medicine, in print*.
- 761 [100] Loohuis LO, Witzel A, Mishra B (2014) Cancer hybrid automata: model, beliefs and therapy.  
762 *Information and Computation* 236:68–86.
- 763 [101] Korsunsky I (2016) Ph.D. thesis (New York University).
- 764 [102] Reed J, et al. (2012) Identifying individual dna species in a complex mixture by precisely  
765 measuring the spacing between nicking restriction enzymes with atomic force microscope.  
766 *Journal of The Royal Society Interface* 9:2341–2350.
- 767 [103] Sundstrom A, et al. (2012) Image analysis and length estimation of biomolecules using afm.  
768 *IEEE Transactions on Information Technology in Biomedicine* 16:1200–1207.

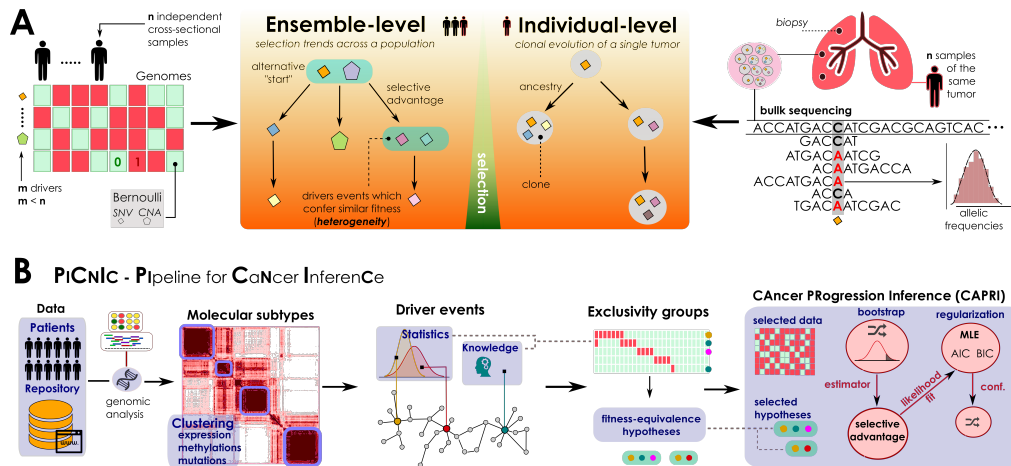

Figure 1: **A.** Problem statement. (left) Inference of ensemble-level cancer progression models from a cohort of  $n$  independent patients (cross-sectional). By examining a list of somatic mutations or CNAs per patient (0/1 variables) we infer a probabilistic graphical model of the temporal ordering of fixation and accumulation of such alterations in the input cohort. Sample size and tumor heterogeneity complicate the problem of extracting population-level trends, as this requires accounting for patients' specificities such as multiple starting events. (right) For an individual tumor, its clonal phylogeny and prevalence is usually inferred from multiple biopsies or single-cell sequencing data. Phylogeny-tree reconstruction from an underlying statistical model of reads coverage or depths estimates alterations' prevalence in each clone, as well as ancestry relations. This problem is mostly worsened by the high intra-tumor heterogeneity and sequencing issues. **B.** The PiCnIc pipeline for ensemble-level inference includes several sequential steps to reduce tumor heterogeneity, before applying the CAPRI [40] algorithm. Available mutation, expression or methylation data are first used to stratify patients into distinct tumor molecular subtypes, usually by exploiting clustering tools. Then, subtype-specific alterations driving cancer initiation and progression are identified with statistical tools and on the basis of prior knowledge. Next is the identification of the fitness-equivalent groups of mutually exclusive alterations across the input population, again done with computational tools or biological priors. Finally, CAPRI processes a set of relevant alterations within such groups. Via bootstrap and hypothesis-testing, CAPRI extracts a set of "selective advantage relations" among them, which is eventually narrowed down via maximum likelihood estimation with regularization (with various scores). The ensemble-level progression model is obtained by combining such relations in a graph, and its confidence is assessed via various bootstrap and cross-validation techniques.

|  |                         | MOTIVATION                                                                     | INPUT DATA * |             |            |              | COMPUTATIONAL OPTIONS AND PRIOR KNOWLEDGE ‡                                                                                               | EXPECTED OUTPUT AND ACTION TO EXECUTE                                                                             |                                                         |                                                                                                  |
|-----------------------------------------------------------------------------------|-------------------------|--------------------------------------------------------------------------------|--------------|-------------|------------|--------------|-------------------------------------------------------------------------------------------------------------------------------------------|-------------------------------------------------------------------------------------------------------------------|---------------------------------------------------------|--------------------------------------------------------------------------------------------------|
|                                                                                   |                         |                                                                                | Mutations    | Copy Number | Expression | Methylations |                                                                                                                                           | Other                                                                                                             |                                                         |                                                                                                  |
| 1                                                                                 | <b>Cohort subtyping</b> | Determine molecular subtypes likely to progress through different trajectories | ✓            | ✓           | ✓          |              | Non-negative Matrix Factorization (NMF), k-Means, Gaussian Mixtures, Hierarchical/Spectral Clustering, Network Based Stratification (NBS) | Biomarkers (cell types, known mutations, ...), Clinical Annotations (Mutation Status, Chromosomal Stability, ...) | Stratified samples (clusters)                           | Split the cohort according to each cluster                                                       |
| 2                                                                                 | <b>Events selection</b> | Select a subset of alterations likely to drive progression                     | ✓            | ✓           | ✓          |              | MutSigCV, OncodriveFM, OncodriveCLUST, MuSiC, Oncodrive-CIS, Intogen                                                                      | Known cancer oncogenes and tumor suppressors, known pathways                                                      | A rank of genes and their alterations                   | In each cluster, restrict to consider only driver events                                         |
| 3                                                                                 | <b>Groups detection</b> | Select groups of alterations which should be examined together                 | ✓            | ✓           | ✓          |              | Ratio test, RME, MEMO, MUTEX, Dendrix, MDPFinder, Multi-Dendrix, CoMEt, MEGSA, ME test                                                    | Known pathway genes with alternative but fitness-equivalent status, or co-occurrently altered                     | Groups satisfying certain statistics (e.g. exclusivity) | For each cluster, for each of its groups, create a logical formula consistent with the statistic |
| 4                                                                                 | <b>Model Inference</b>  | Select the Graphical Model which explains best the data                        | ✓            | ✗           | ✗          |              | CAPRI ★, CAPRESE, Oncotrees, Distance-based, Mixtures, CBN, Resic, BML                                                                    |                                                                                                                   | One progression model per subtype                       | Validate statistically or experimentally each one of the inferred models                         |

\* Data marked as ★ can be used when it is persistent (i.e., do not revert back to their original state) during tumor progression. Other: data not common to most tumor types such as fusions or partial tandem duplication.  
 ‡ Not all tools support all the data that is theoretically usable for a certain step.  
 ★ CAPRI is the only algorithm to exploit knowledge provided by step 3 via logical formulas hypotheses-testing. Oncotrees, Distance-based, Mixtures and CAPRESE are constrained to infer at most tree-models of progression.

Figure 2: The PiCnIc pipeline. We do not provide a unique all-encompassing rationale to instantiate PiCnIc as all steps refer to research area currently development, where the optimal approach is often dependent on the type of data available and prior knowledge about the cancer under study. References are provided for each tool that can be used to instantiate PiCnIc: NMF [61], k-Means, Gaussian Mixtures, Hierarchical/Spectral Clustering [62], NBS [66], MutSigCV [68], OncodriveFM [69], OncodriveCLUST [70], MuSiC [71] Oncodrive-CIS [72] Intogen [73], Ratio [74], RME [75], MEMO [76], MUTEX [77], Dendrix [78], MDPFinder [79], Multi-Dendrix [80], CoMEt [81], MEGSA [82], ME [83], CAPRI [40], CAPRESE [39], Oncotrees [31, 33], Distance-based [32], Mixtures [34], CBN [35, 36], Resic [37] and BML [38].



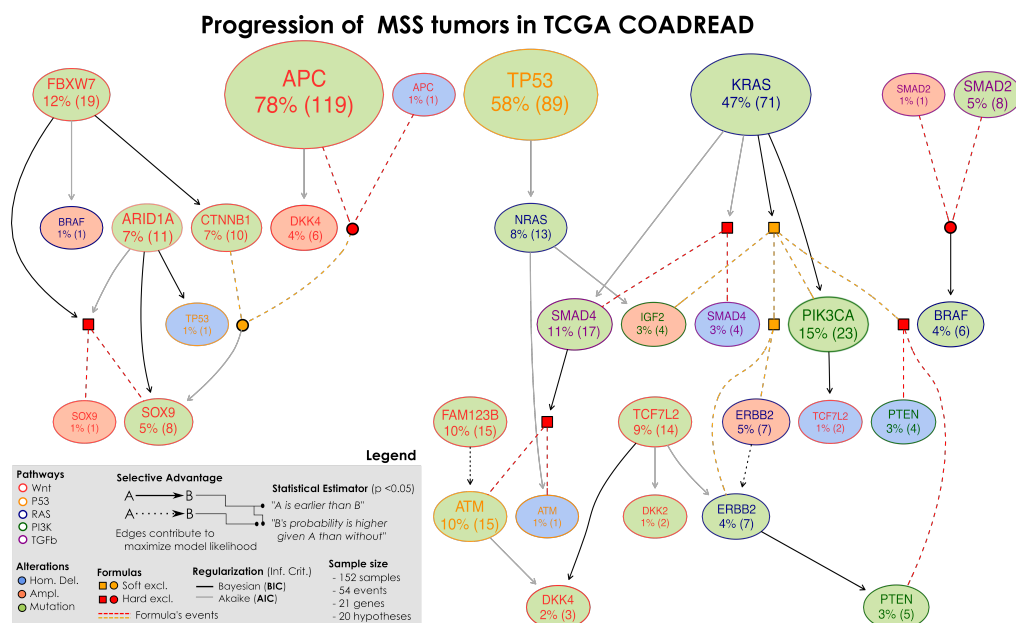

Figure 4: Selective advantage relations inferred by CAPRI constitute MSS progression; input dataset in Supplementary Figure S3 and S4. Formulas written on groups of exclusive alterations, e.g., SOX9 amplifications and mutations, are displayed in expanded form; their events are connected by dashed lines with colors representing the type of exclusivity (red for hard, orange for soft), logical connectives are squared when the formula is selected, and circular when the formula selects for a downstream node. For this model of MSS tumors in COADREAD, we find strong statistical support for many edges (p-values, bootstrap scores and cross-validation statistics shown as Supplementary Material), as well as the overall model. This model captures both current knowledge about CRC progression – e.g, selection of alterations in PI3K genes by the KRAS mutations (directed or via the MEMO group, with BIC) – as well as novel interesting testable hypotheses – e.g., selection of SOX9 alterations by FBXW7 mutations (with BIC).

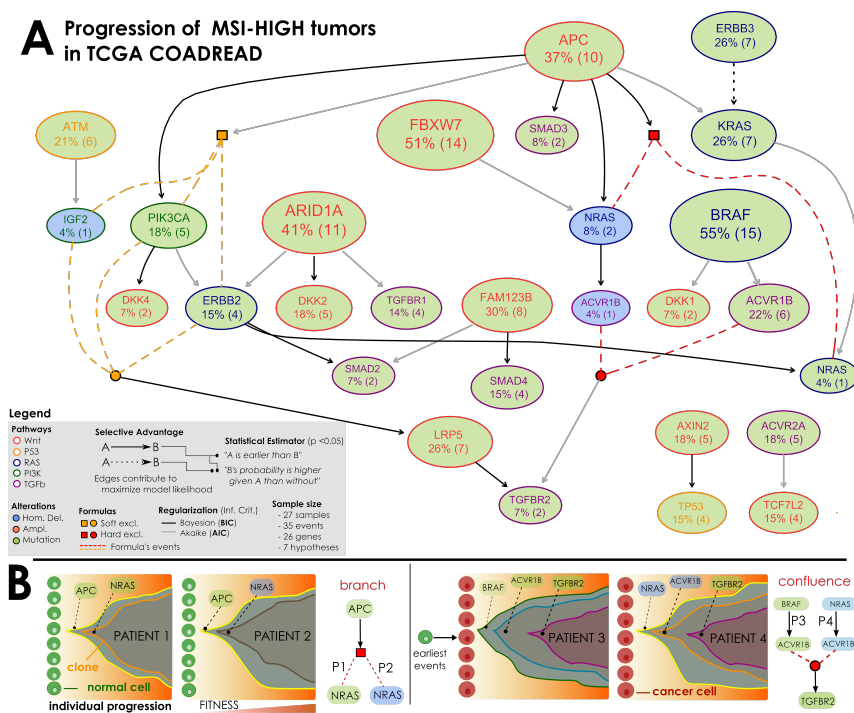

Figure 5: **A.** Selective advantage relations inferred by CAPRI constitute MSI-HIGH progression; input dataset in Figure 3. Formulas written on groups of exclusive alterations are expanded as in Figure 4. For each relation, confidence is estimated as for MSS tumors and reported as Supplementary Material. In general, this model is supported by weaker statistics than MSS tumors – possibly because of this small sample size ( $n=27$ ). Still, we can find interesting relations involving APC mutations which select for PIK3CA ones (via BIC) as well as selection of the MEMO group (ERBB2/PIK3CA mutations or IGF2 deletions) predicted by AIC. Similarly, we find a strong selection trend among mutations in ERBB2 and KRAS, despite in this case the temporal precedence among those mutations is not disentangled as the two events have the same marginal frequencies (26%). **B.** Evolutionary trajectories of clonal expansion predicted from two selective advantage relations in the model. APC-mutated clones shall enjoy expansion, up to acquisition of further selective advantage via mutations or homozygous deletions in NRAS. These cases should be representative of different individuals in the population, and the ensemble-level interpretation should be that “APC mutations select for NRAS alterations, in hard exclusivity” as no sample harbour both alterations. A similar argument can show that the clones of patients harbouring distinct alterations in ACVR1B – and different upstream events – will enjoy further selective advantage from mutation in the TGFR2 gene.
